# Supplementary material for: BSMAP: whole genome bisulfite sequence MAPping program
Source: Springer Nature journal article supplement (doi:10.1186/1471-2105-10-232), 2009-07-27
Supplement: 12859_2009_2962_MOESM1_ESM.pdf [file 12859_2009_2962_MOESM1_ESM.pdf]

Watson >>**AC<sup>m</sup>GTT**CGCTTGAG****>>

Crick <<**TGC<sup>m</sup>AAG**CGAACTC****<<

**C<sup>m</sup>** methylated

**C** Un-methylated

1) Denaturation

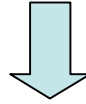

Watson >>**AC<sup>m</sup>GTT**CGCTTGAG****>>

Crick <<**TGC<sup>m</sup>AAG**CGAACTC****<<

2) Bisulfite Treatment

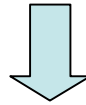

BSW >>**AC<sup>m</sup>GTT**UGU**TTGAG**>>

BSC <<**TGC<sup>m</sup>AAG**UGAA**UTU**<<

3) PCR Amplification

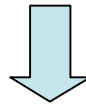

BSW >>**AC<sup>m</sup>GTT**TGTT**TGAG**>>

BSC <<**TGC<sup>m</sup>AAG**TGA**ATTT**<<

BSWR <<**TG CAA**CA**AACTC**<<

BSCR >>**ACG TTC**ACTTAA****>>
