# Supplementary material for: BSMAP: whole genome bisulfite sequence MAPping program
Source: Springer Nature journal article supplement (doi:10.1186/1471-2105-10-232), 2009-07-27

## 1) Multiple Mapping

Bisulfite Read

>>**ATTTCG**>>

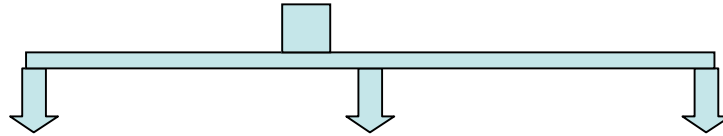

Reference

>>AT**ACTTTCG**ATG**ATCTTCG**CAAG**ACTCCG**GC>>

## 2) Mapping Asymmetry

Bisulfite Read

Reference

C ←→ C

T ←→ T

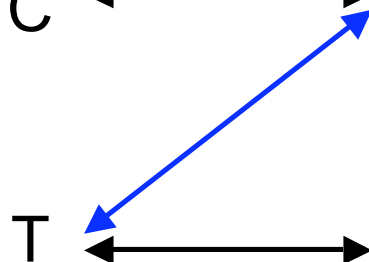

Supplement: 12859_2009_2962_MOESM2_ESM.pdf [file 12859_2009_2962_MOESM2_ESM.pdf]
