# Supplementary material for: BSMAP: whole genome bisulfite sequence MAPping program
Source: Springer Nature journal article supplement (doi:10.1186/1471-2105-10-232), 2009-07-27
Supplement: 12859_2009_2962_MOESM3_ESM.pdf [file 12859_2009_2962_MOESM3_ESM.pdf]

# A

## Reference

>> **ACGTCGCT** TGATAGCT >>

Coordinate: 4875362

## Seed Table

original seed

bisulfite seeds

| key             | value        |
|-----------------|--------------|
| <b>ACGTCGCT</b> | 4875362, ... |
| <b>ACGTCGTT</b> | 4875362, ... |
| <b>ACGTTGCT</b> | 4875362, ... |
| <b>ACGTTGTT</b> | 4875362, ... |
| <b>ATGTCGCT</b> | 4875362, ... |
| <b>ATGTCGTT</b> | 4875362, ... |
| <b>ATGTTGCT</b> | 4875362, ... |
| <b>ATGTTGTT</b> | 4875362, ... |

**Read** >> **ATGTCGCT** TGAGAGCT >>

# B

**Ref** >> **ACGTCGCT** TGATAGCT >>

**Mask** 110111110111011111111111111111110111

**Read** >> **ATGTCGCT** **TAA**CAGCT >>

001110110110011111100000100100111

**Masked Read** >> **ACGTCGCT** **TAA**CAGCT >>

000110110110011111100000100100111

# C

**Ref** >> **ACGTCGCT** **TGA**TAGCT >>

00011011011001111110001100100111

**Masked Read** >> **ACGTCGCT** **TAA**CAGCT >>

000110110110011111100000100100111

**XOR Result** 00000000000000000000000010001000000000

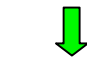

match

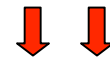

mismatch
