# Supplementary material for: BSMAP: whole genome bisulfite sequence MAPping program
Source: Springer Nature journal article supplement (doi:10.1186/1471-2105-10-232), 2009-07-27

Reference

Watson >>CT**ACGGCT**GT>>

Crick >>AC**AGCCGT**AG>>

Possible Bisulfite Reads

From BSW >>**ACGGTT**>>

From BSWR >>**AACCGT**>>

From BSC >>**AGTCGT**>>

From BSCR >>**ACGACT**>>

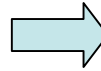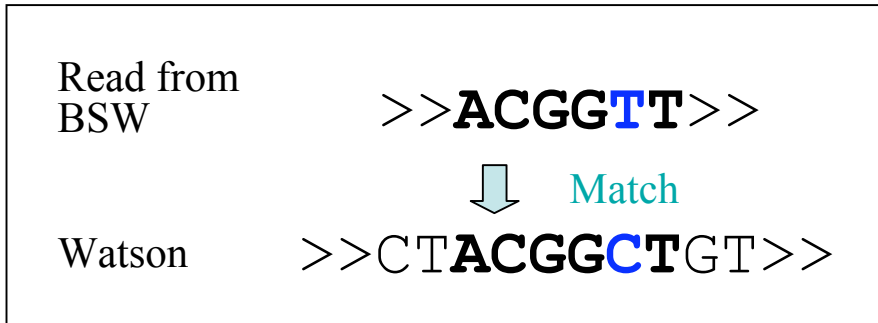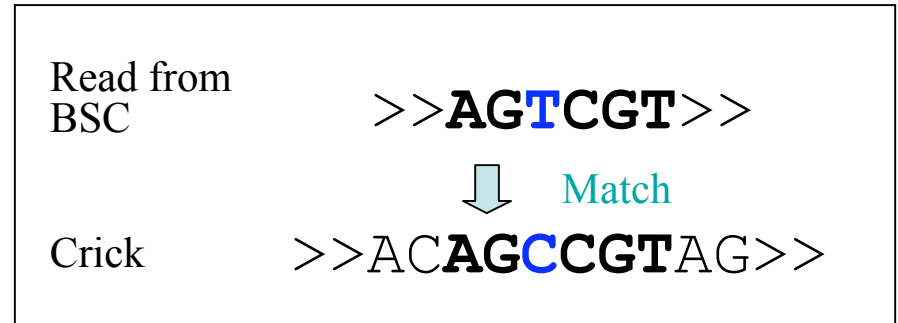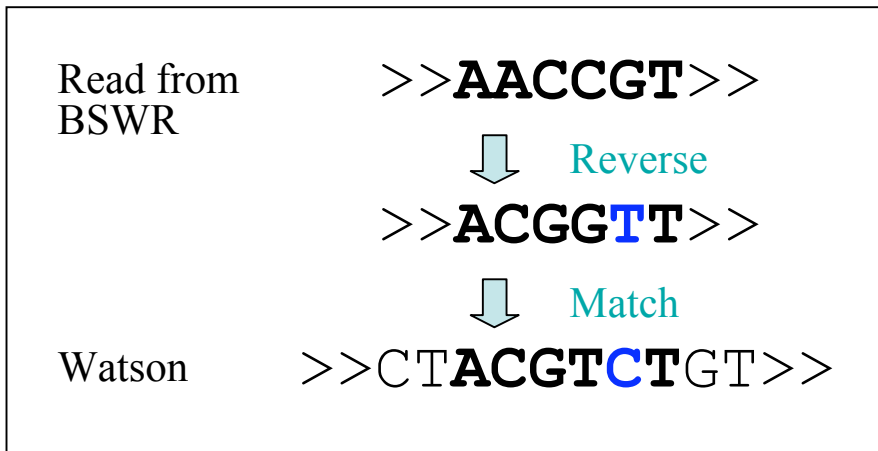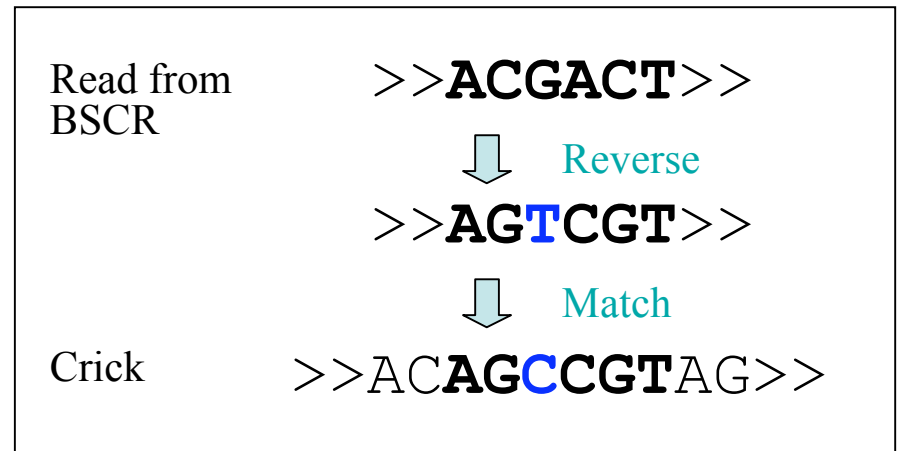

Supplement: 12859_2009_2962_MOESM4_ESM.pdf [file 12859_2009_2962_MOESM4_ESM.pdf]
